# Supplementary material
Source: bioRxiv or medRxiv preprint supplement (https://medrxiv.org/highwire/filestream/69451/field_highwire_adjunct_files/1/19008474-2.pdf)
Supplement: Supplementary file [file 19008474-2.pdf]

## Supplementary Materials 2: Further Model Estimates

NB this supplementary data is from: Richard M.A. Parker, George Leckie, Harvey Goldstein, Laura D. Howe, Jon Heron, Alun D. Hughes, David M. Phillippo, Kate Tilling. “Joint modelling of individual trajectories, within-individual variability and a later outcome: systolic blood pressure through childhood and left ventricular mass in early adulthood”

### Table of Contents

|                                                                                                                                                                                                                                   |    |
|-----------------------------------------------------------------------------------------------------------------------------------------------------------------------------------------------------------------------------------|----|
| Overview.....                                                                                                                                                                                                                     | 2  |
| I: Univariate outcome models (3-level) analysing the same sample and covariates as models presented in main manuscript .....                                                                                                      | 3  |
| II: Two-level joint outcome models analysing the same sample and covariates as models presented in main manuscript.....                                                                                                           | 6  |
| III: Univariate model of SBP fitted to all those for whom at least one mean SBP measurement, from at least one of the six clinics, is available (i.e. regardless of whether the individual later had their LVMI estimated). ..... | 10 |
| IV: Univariate outcome model (3-level), with sex as only covariate (analysing the same sample and covariates as models presented in main manuscript) .....                                                                        | 13 |
| V: Full estimates from the joint models presented in the main manuscript.....                                                                                                                                                     | 15 |

## Overview

These supplementary materials includes estimates from: (a) univariate outcome (SBP) models analysing the same sample and covariates presented below to investigate the influence of the submodel for  $\log(\text{LVMI})$  on the random effect estimates; (b) models in which the mean of the BP measurements taken for each individual at each clinic was analysed as the repeatedly-measured exposure, in 2-level models akin to equation 2, above, to compare modelling clinic BP; (c) a univariate outcome model of SBP, allowing for complex BPV, fitted to all those for whom at least one mean SBP measurement, from at least one of the six clinics, is available (regardless of whether later had LVMI estimated) to check whether restricting the analysis sample to those with LVMI measures has any effect on model for change in SBP, and therefore examining possible selection bias; (d) a model in which sex is the only observed covariate included, for comparison with published findings elsewhere<sup>1,2</sup>; and (e) full model estimates from the joint models presented in the main manuscript.

**I: Univariate outcome models (3-level) analysing the same sample and covariates as models presented in main manuscript**

As Table I indicates, univariate outcome (SBP) models analysing the same sample and covariates as in the main manuscript yielded substantively similar estimates to joint models, indicating modest influence of the submodel for the subsequent outcome (log(LVMI)) on the random effect estimates.

Table I. Estimates from univariate outcome models, analysing SBP as the outcome, presenting the mean and credible intervals for the posterior parameter estimates of the regression coefficients (except where indicated).

| Model                          | Suppl Model A: Age & Sex |        |        | Suppl Model B: Adding weight and height |        |        | Suppl Model C: Adding maternal characteristics |        |        |
|--------------------------------|--------------------------|--------|--------|-----------------------------------------|--------|--------|------------------------------------------------|--------|--------|
|                                | Mean                     | 2.5%   | 97.5%  | Mean                                    | 2.5%   | 97.5%  | Mean                                           | 2.5%   | 97.5%  |
| N individuals                  | 1,986                    |        |        | 1,986                                   |        |        | 1,813                                          |        |        |
| N clinic visits                | 10,556                   |        |        | 10,556                                  |        |        | 9,693                                          |        |        |
| N BP measurements              | 19,360                   |        |        | 19,360                                  |        |        | 17,777                                         |        |        |
| <b>Mean SBP: fixed effects</b> |                          |        |        |                                         |        |        |                                                |        |        |
| Intercept                      | 107.96                   | 107.51 | 108.40 | 107.96                                  | 107.55 | 108.37 | 108.22                                         | 107.28 | 109.14 |
| ≤12 years <sup>a</sup>         | 1.71                     | 1.58   | 1.84   | -0.49                                   | -0.73  | -0.24  | -0.48                                          | -0.75  | -0.22  |
| >12 years <sup>a</sup>         | 6.02                     | 5.81   | 6.22   | 3.94                                    | 3.62   | 4.26   | 3.95                                           | 3.62   | 4.29   |
| Female                         | -0.43                    | -1.05  | 0.18   | -0.45                                   | -1.01  | 0.11   | -0.28                                          | -0.86  | 0.30   |
| Female*≤12 years               | 0.07                     | -0.11  | 0.25   | -0.14                                   | -0.32  | 0.04   | -0.16                                          | -0.34  | 0.03   |
| Female*>12 years               | -2.00                    | -2.28  | -1.71  | -1.33                                   | -1.63  | -1.02  | -1.32                                          | -1.64  | -1.00  |

|                                         |        |        |        |        |       |        |        |       |        |
|-----------------------------------------|--------|--------|--------|--------|-------|--------|--------|-------|--------|
| log(Weight, kg)                         |        |        | 17.44  | 15.84  | 19.05 | 17.04  | 15.37  | 18.72 |        |
| Height (cm)                             |        |        | 0.02   | -0.02  | 0.07  | 0.03   | -0.02  | 0.08  |        |
| Maternal characteristics                |        |        |        |        |       |        |        |       |        |
| Age at delivery (years)                 |        |        |        |        |       | 0.01   | -0.06  | 0.08  |        |
| Parity                                  |        |        |        |        |       | -0.17  | -0.50  | 0.16  |        |
| Highest ed.: vocational <sup>b</sup>    |        |        |        |        |       | 0.03   | -1.31  | 1.35  |        |
| Highest ed.: O-level <sup>b</sup>       |        |        |        |        |       | 0.09   | -0.90  | 1.11  |        |
| Highest ed.: A-level <sup>b</sup>       |        |        |        |        |       | -0.61  | -1.65  | 0.44  |        |
| Highest ed.: Degree <sup>b</sup>        |        |        |        |        |       | -1.32  | -2.42  | -0.20 |        |
| Individual-level random effects for SBP |        |        |        |        |       |        |        |       |        |
| SD(mean BP) <sup>c</sup>                | 6.12   | 5.88   | 6.37   | 5.36   | 5.14  | 5.59   | 5.38   | 5.15  | 5.62   |
| SD(BP slope) <sup>c</sup>               | 0.66   | 0.56   | 0.76   | 0.65   | 0.55  | 0.74   | 0.65   | 0.55  | 0.75   |
| SD(log(BPV)) <sup>c</sup>               | 0.43   | 0.33   | 0.53   | 0.41   | 0.30  | 0.51   | 0.44   | 0.32  | 0.54   |
| Cor(mean BP, BP slope) <sup>c</sup>     | -0.09  | -0.20  | 0.02   | -0.11  | -0.23 | 0.00   | -0.09  | -0.21 | 0.03   |
| Cor(mean BP, log(BPV)) <sup>c</sup>     | 0.51   | 0.36   | 0.67   | 0.47   | 0.30  | 0.65   | 0.48   | 0.32  | 0.66   |
| Cor(BP slope, log(BPV)) <sup>c</sup>    | -0.05  | -0.31  | 0.21   | -0.05  | -0.32 | 0.23   | -0.05  | -0.32 | 0.21   |
| BPV: fixed effects                      |        |        |        |        |       |        |        |       |        |
| Intercept                               | 3.21   | 3.11   | 3.31   | 3.14   | 3.03  | 3.24   | 3.11   | 3.00  | 3.22   |
| Age (years) <sup>d</sup>                | 15.58% | 12.85% | 18.40% | 10.57% | 5.35% | 16.14% | 9.99%  | 4.39% | 15.85% |
| Female <sup>d</sup>                     | 17.10% | 4.71%  | 30.83% | 18.41% | 5.41% | 33.04% | 20.81% | 6.85% | 36.63% |
| log(Weight, kg) <sup>e</sup>            |        |        | 5.41%  | 1.78%  | 9.12% | 4.77%  | 0.99%  | 8.65% |        |

|                           |      |      |      |        |        |       |        |        |       |
|---------------------------|------|------|------|--------|--------|-------|--------|--------|-------|
| Height (cm) <sup>d</sup>  |      |      |      | -0.18% | -1.19% | 0.82% | -0.02% | -1.09% | 1.06% |
| Residual within-clinic SD |      |      |      |        |        |       |        |        |       |
| for SBP                   | 5.62 | 5.54 | 5.70 | 5.63   | 5.54   | 5.71  | 5.62   | 5.53   | 5.70  |

<sup>a</sup> Linear spline terms, corresponding to change per year for age  $\leq 12$ , and for age  $>12$ , respectively.

<sup>b</sup> Reference category for mother's highest education qualification: CSE / None.

<sup>c</sup> mean BP denotes the individual-level, between-clinic, random effects for the intercept (at mean age 11.3 years) in the mean function for SBP; BP slope denotes the individual-level, between-clinic, random effects for age in the mean function for SBP; log(BPV) denotes the individual-level, between-clinic, random effects on the log-scale of the within-individual variance.

<sup>d</sup> estimates presented as percentage change in LVMI (on natural scale) per 1-unit change in covariate.

<sup>e</sup> estimates presented as percentage change in BPV / LVMI (on natural scale) per 10% increase in covariate (on natural scale).

1 **II: Two-level joint outcome models analysing the same sample and covariates as models presented in main manuscript**

2 As Table II indicates, when modelling mean clinic BP as the outcome (in two-level models), the estimated associations were substantively similar  
 3 to those found in the three-level models in the main manuscript, although with some differences. For example, the SD of the log(BPV) random  
 4 effects is estimated to be smaller in the two-level models, indicating that individuals are estimated to differ to a lesser degree in how erratic their  
 5 BP measurements are when mean clinic BP is modelled as the outcome. In addition, the fixed intercept in the log(BPV) function is larger in the  
 6 two-level models, indicating that within-individual variance is estimated to be greater, whilst the estimates of the fixed effects in that function are  
 7 smaller.

8 Table II. Estimates from 2-level joint models with shared random effects, analysing SBP and log(LVMI) as outcomes, presenting the mean and  
 9 credible intervals for the posterior parameter estimates of the regression coefficients (except where indicated). The repeatedly-measured outcome  
 10 is the mean of the SBP measurements taken for each individual at each clinic.

| Model           | mean BP only |      |       | BP slope only |      |       | log(BPV) only |      |       | mean BP, BP slope, log(BPV) all included |      |       |
|-----------------|--------------|------|-------|---------------|------|-------|---------------|------|-------|------------------------------------------|------|-------|
|                 | Mean         | 2.5% | 97.5% | Mean          | 2.5% | 97.5% | Mean          | 2.5% | 97.5% | Mean                                     | 2.5% | 97.5% |
| N individuals   | 1,813        |      |       | 1,813         |      |       | 1,813         |      |       | 1,813                                    |      |       |
| N clinic visits | 9,693        |      |       | 9,693         |      |       | 9,693         |      |       | 9,693                                    |      |       |

Mean SBP: fixed effects

|                                         |        |        |        |        |        |        |        |        |        |        |        |        |
|-----------------------------------------|--------|--------|--------|--------|--------|--------|--------|--------|--------|--------|--------|--------|
| Intercept                               | 107.84 | 106.90 | 108.77 | 107.81 | 106.87 | 108.75 | 107.82 | 106.88 | 108.74 | 107.83 | 106.90 | 108.76 |
| ≤12 years <sup>a</sup>                  | -0.49  | -0.76  | -0.22  | -0.44  | -0.70  | -0.18  | -0.45  | -0.71  | -0.19  | -0.51  | -0.78  | -0.25  |
| >12 years <sup>a</sup>                  | 3.91   | 3.57   | 4.24   | 3.97   | 3.64   | 4.30   | 3.96   | 3.62   | 4.30   | 3.86   | 3.52   | 4.20   |
| Female                                  | -0.17  | -0.76  | 0.42   | -0.19  | -0.77  | 0.39   | -0.19  | -0.77  | 0.39   | -0.14  | -0.73  | 0.44   |
| Female*≤12 years                        | -0.17  | -0.36  | 0.02   | -0.16  | -0.35  | 0.03   | -0.16  | -0.35  | 0.03   | -0.18  | -0.37  | 0.01   |
| Female*>12 years                        | -1.28  | -1.60  | -0.96  | -1.32  | -1.64  | -1.00  | -1.31  | -1.64  | -0.99  | -1.25  | -1.57  | -0.92  |
| log(Weight, kg)                         | 16.37  | 14.66  | 18.07  | 16.53  | 14.85  | 18.21  | 16.55  | 14.85  | 18.25  | 16.13  | 14.42  | 17.86  |
| Height (cm)                             | 0.05   | 0.00   | 0.10   | 0.04   | -0.01  | 0.08   | 0.04   | -0.01  | 0.09   | 0.06   | 0.01   | 0.11   |
| Maternal characteristics                |        |        |        |        |        |        |        |        |        |        |        |        |
| Age at delivery (years)                 | 0.02   | -0.06  | 0.09   | 0.01   | -0.06  | 0.08   | 0.01   | -0.06  | 0.08   | 0.02   | -0.06  | 0.09   |
| Parity                                  | -0.16  | -0.49  | 0.17   | -0.17  | -0.50  | 0.17   | -0.16  | -0.50  | 0.17   | -0.16  | -0.49  | 0.17   |
| Highest ed.: vocational <sup>b</sup>    | -0.06  | -1.40  | 1.25   | -0.01  | -1.33  | 1.31   | -0.02  | -1.35  | 1.30   | -0.08  | -1.41  | 1.24   |
| Highest ed.: O-level <sup>b</sup>       | 0.11   | -0.86  | 1.10   | 0.16   | -0.83  | 1.14   | 0.15   | -0.84  | 1.14   | 0.10   | -0.89  | 1.09   |
| Highest ed.: A-level <sup>b</sup>       | -0.59  | -1.62  | 0.45   | -0.56  | -1.60  | 0.48   | -0.56  | -1.61  | 0.48   | -0.60  | -1.63  | 0.42   |
| Highest ed.: Degree <sup>b</sup>        | -1.37  | -2.50  | -0.28  | -1.32  | -2.43  | -0.22  | -1.32  | -2.42  | -0.20  | -1.39  | -2.48  | -0.29  |
| Individual-level random effects for SBP |        |        |        |        |        |        |        |        |        |        |        |        |
| SD(mean BP) <sup>c</sup>                | 5.35   | 5.12   | 5.59   | 5.36   | 5.12   | 5.59   | 5.35   | 5.12   | 5.59   | 5.35   | 5.12   | 5.59   |
| SD(BP slope) <sup>c</sup>               | 0.61   | 0.49   | 0.71   | 0.60   | 0.49   | 0.71   | 0.60   | 0.49   | 0.71   | 0.60   | 0.48   | 0.70   |
| SD(log(BPV)) <sup>c</sup>               | 0.27   | 0.21   | 0.33   | 0.27   | 0.21   | 0.33   | 0.26   | 0.19   | 0.33   | 0.26   | 0.19   | 0.33   |
| Cor(mean BP, BP slope) <sup>c</sup>     | -0.09  | -0.22  | 0.04   | -0.06  | -0.20  | 0.07   | -0.09  | -0.22  | 0.04   | -0.09  | -0.23  | 0.04   |

|                                      |        |        |        |        |        |        |        |        |        |        |        |        |
|--------------------------------------|--------|--------|--------|--------|--------|--------|--------|--------|--------|--------|--------|--------|
| Cor(mean BP, log(BPV)) <sup>c</sup>  | 0.49   | 0.34   | 0.66   | 0.49   | 0.34   | 0.66   | 0.51   | 0.35   | 0.70   | 0.51   | 0.34   | 0.70   |
| Cor(BP slope, log(BPV)) <sup>c</sup> | -0.09  | -0.36  | 0.19   | -0.11  | -0.38  | 0.16   | -0.07  | -0.35  | 0.22   | -0.09  | -0.39  | 0.20   |
| BPV: fixed effects                   |        |        |        |        |        |        |        |        |        |        |        |        |
| Intercept                            | 3.74   | 3.68   | 3.80   | 3.74   | 3.68   | 3.80   | 3.74   | 3.68   | 3.80   | 3.75   | 3.69   | 3.80   |
| Age (years) <sup>d</sup>             | 5.34%  | 1.94%  | 8.80%  | 5.42%  | 2.03%  | 8.92%  | 5.35%  | 1.93%  | 8.84%  | 6.12%  | 2.65%  | 9.74%  |
| Female <sup>d</sup>                  | 12.68% | 4.73%  | 21.10% | 12.77% | 4.83%  | 21.27% | 12.79% | 4.94%  | 21.17% | 12.13% | 4.31%  | 20.54% |
| log(Weight, kg) <sup>e</sup>         | 3.30%  | 1.03%  | 5.65%  | 3.33%  | 1.05%  | 5.68%  | 3.24%  | 0.96%  | 5.62%  | 3.68%  | 1.37%  | 6.07%  |
| Height (cm) <sup>d</sup>             | -0.16% | -0.82% | 0.51%  | -0.19% | -0.86% | 0.48%  | -0.14% | -0.82% | 0.54%  | -0.35% | -1.06% | 0.35%  |
| Mean for log(LVMI): fixed effects    |        |        |        |        |        |        |        |        |        |        |        |        |
| Intercept                            | 3.32   | 3.31   | 3.33   | 3.32   | 3.31   | 3.33   | 3.32   | 3.31   | 3.33   | 3.32   | 3.31   | 3.33   |
| Age (years) <sup>d</sup>             | -1.98% | -4.65% | 0.78%  | -2.11% | -4.74% | 0.62%  | -2.05% | -4.73% | 0.69%  | -1.95% | -4.63% | 0.80%  |
| Female <sup>d</sup>                  | -5.00% | -6.76% | -3.20% | -4.98% | -6.75% | -3.21% | -5.01% | -6.76% | -3.22% | -4.95% | -6.72% | -3.16% |
| Weight (kg) <sup>d</sup>             | 0.70%  | 0.63%  | 0.77%  | 0.70%  | 0.63%  | 0.77%  | 0.70%  | 0.62%  | 0.77%  | 0.70%  | 0.63%  | 0.78%  |
| mean BP <sup>c,d</sup>               | 0.20%  | 0.00%  | 0.40%  |        |        |        |        |        |        | 0.63%  | 0.17%  | 1.31%  |
| BP slope <sup>c,d</sup>              |        |        |        | 2.98%  | -0.54% | 7.07%  |        |        |        | 4.12%  | -0.12% | 9.52%  |
| log(BPV) <sup>c,e</sup>              |        |        |        |        |        |        | 0.25%  | -0.45% | 1.00%  | -1.34% | -3.59% | 0.17%  |
| Residual SD for log(LVMI)            | 0.19   | 0.18   | 0.20   | 0.19   | 0.18   | 0.20   | 0.19   | 0.18   | 0.20   | 0.19   | 0.18   | 0.19   |

11 <sup>a</sup> Linear spline terms, corresponding to change per year for age  $\leq 12$ , and for age  $>12$ , respectively.

12 <sup>b</sup> Reference category for mother's highest education qualification: CSE / None.



13 <sup>c</sup> mean BP denotes the individual-level, between-clinic, random effects for the intercept (at mean age 11.3 years) in the mean function for SBP;  
14 BP slope denotes the individual-level, between-clinic, random effects for age in the mean function for SBP; log(BPV) denotes the individual-level,  
15 between-clinic, random effects on the log-scale of the within-individual variance.

16 <sup>d</sup> estimates presented as percentage change in LVMI (on natural scale) per 1-unit change in covariate.

17 <sup>e</sup> estimates presented as percentage change in BPV / LVMI (on natural scale) per 10% increase in covariate (on natural scale).

18

19 **III: Univariate model of SBP fitted to all those for whom at least one mean SBP measurement, from at least one of the six clinics, is**  
 20 **available (i.e. regardless of whether the individual later had their LVMI estimated).**

21 As Table III indicates, a univariate outcome model of SBP fitted to all those for whom at least one mean SBP measurement, from at least one of  
 22 the six clinics, was available found associations broadly in keeping with those in the smaller subset modelled in the main manuscript. The SD of  
 23 the log(BPV) random effects was a little higher in this larger sample, and age and sex were estimated to have smaller associations with log(BPV),  
 24 and weight and height larger associations, as well.

25 Table III. Estimates from univariate outcome models, analysing SBP as the outcome, presenting the mean and credible intervals for the posterior  
 26 parameter estimates of the regression coefficients (except where indicated).

| Model                   | Age & Sex |        |        | Adding weight and height |        |        | Adding maternal characteristics |        |        |
|-------------------------|-----------|--------|--------|--------------------------|--------|--------|---------------------------------|--------|--------|
| N individuals           | 9,447     |        |        | 9,447                    |        |        | 8,232                           |        |        |
| N clinic visits         | 40,345    |        |        | 40,345                   |        |        | 35,998                          |        |        |
| N BP measurements       | 73,749    |        |        | 73,749                   |        |        | 65,805                          |        |        |
|                         | Mean      | 2.5%   | 97.5%  | Mean                     | 2.5%   | 97.5%  | Mean                            | 2.5%   | 97.5%  |
| Mean SBP: fixed effects |           |        |        |                          |        |        |                                 |        |        |
| Intercept               | 107.29    | 107.08 | 107.50 | 107.32                   | 107.14 | 107.50 | 107.68                          | 107.29 | 108.08 |
| ≤12 years <sup>a</sup>  | 1.59      | 1.53   | 1.66   | -0.59                    | -0.71  | -0.47  | -0.60                           | -0.72  | -0.47  |
| >12 years <sup>a</sup>  | 5.86      | 5.75   | 5.97   | 3.74                     | 3.58   | 3.91   | 3.77                            | 3.60   | 3.94   |
| Female                  | -0.42     | -0.71  | -0.13  | -0.55                    | -0.81  | -0.29  | -0.47                           | -0.75  | -0.19  |

|                                         |       |       |       |       |       |       |       |       |       |
|-----------------------------------------|-------|-------|-------|-------|-------|-------|-------|-------|-------|
| Female* $\leq$ 12 years                 | 0.20  | 0.11  | 0.29  | -0.03 | -0.13 | 0.06  | -0.03 | -0.13 | 0.06  |
| Female* $>$ 12 years                    | -1.90 | -2.06 | -1.74 | -1.23 | -1.39 | -1.06 | -1.24 | -1.42 | -1.07 |
| log(Weight, kg)                         |       |       |       | 17.64 | 16.85 | 18.42 | 17.45 | 16.61 | 18.31 |
| Height (cm)                             |       |       |       | 0.02  | 0.00  | 0.05  | 0.03  | 0.00  | 0.05  |
| Maternal characteristics                |       |       |       |       |       |       |       |       |       |
| Age at delivery (years)                 |       |       |       |       |       |       | -0.01 | -0.04 | 0.03  |
| Parity                                  |       |       |       |       |       |       | -0.13 | -0.29 | 0.02  |
| Highest ed.: vocational <sup>b</sup>    |       |       |       |       |       |       | 0.05  | -0.54 | 0.64  |
| Highest ed.: O-level <sup>b</sup>       |       |       |       |       |       |       | -0.23 | -0.67 | 0.20  |
| Highest ed.: A-level <sup>b</sup>       |       |       |       |       |       |       | -0.73 | -1.19 | -0.27 |
| Highest ed.: Degree <sup>b</sup>        |       |       |       |       |       |       | -1.17 | -1.70 | -0.65 |
| Individual-level random effects for SBP |       |       |       |       |       |       |       |       |       |
| SD(mean BP) <sup>c</sup>                | 6.19  | 6.07  | 6.32  | 5.28  | 5.16  | 5.39  | 5.25  | 5.13  | 5.37  |
| SD(BP slope) <sup>c</sup>               | 0.73  | 0.68  | 0.79  | 0.71  | 0.65  | 0.76  | 0.71  | 0.65  | 0.76  |
| SD(log(BPV)) <sup>c</sup>               | 0.54  | 0.50  | 0.59  | 0.53  | 0.48  | 0.58  | 0.54  | 0.48  | 0.59  |
| Cor(mean BP, BP slope) <sup>c</sup>     | -0.04 | -0.10 | 0.02  | -0.06 | -0.12 | 0.00  | -0.04 | -0.10 | 0.02  |
| Cor(mean BP, log(BPV)) <sup>c</sup>     | 0.49  | 0.43  | 0.55  | 0.42  | 0.36  | 0.49  | 0.43  | 0.36  | 0.50  |
| Cor(BP slope, log(BPV)) <sup>c</sup>    | -0.09 | -0.21 | 0.02  | -0.11 | -0.22 | 0.01  | -0.09 | -0.21 | 0.03  |
| BPV: fixed effects                      |       |       |       |       |       |       |       |       |       |
| Intercept                               | 3.24  | 3.19  | 3.29  | 3.18  | 3.13  | 3.23  | 3.17  | 3.11  | 3.22  |

|                                      |        |        |        |        |        |        |        |        |        |
|--------------------------------------|--------|--------|--------|--------|--------|--------|--------|--------|--------|
| Age (years) <sup>d</sup>             | 12.75% | 11.30% | 14.23% | 7.98%  | 5.16%  | 10.86% | 7.74%  | 4.72%  | 10.76% |
| Female <sup>d</sup>                  | 12.85% | 6.34%  | 19.70% | 11.87% | 5.27%  | 18.85% | 12.62% | 5.76%  | 20.04% |
| log(Weight, kg) <sup>e</sup>         |        |        |        | 8.48%  | 6.57%  | 10.45% | 8.69%  | 6.62%  | 10.80% |
| Height (cm) <sup>d</sup>             |        |        |        | -0.93% | -1.47% | -0.38% | -0.96% | -1.53% | -0.38% |
| Residual within-clinic SD<br>for SBP | 5.50   | 5.46   | 5.54   | 5.51   | 5.47   | 5.55   | 0.06   | 5.46   | 5.55   |

27 <sup>a</sup> Linear spline terms, corresponding to change per year for age  $\leq 12$ , and for age  $>12$ , respectively.

28 <sup>b</sup> Reference category for mother's highest education qualification: CSE / None.

29 <sup>c</sup> mean BP denotes the individual-level, between-clinic, random effects for the intercept (at mean age 11.3 years) in the mean function for SBP;  
30 BP slope denotes the individual-level, between-clinic, random effects for age in the mean function for SBP; log(BPV) denotes the individual-level,  
31 between-clinic, random effects on the log-scale of the within-individual variance.

32 <sup>d</sup> estimates presented as percentage change in LVMI (on natural scale) per 1-unit change in covariate.

33 <sup>e</sup> estimates presented as percentage change in BPV / LVMI (on natural scale) per 10% increase in covariate (on natural scale).

34

35

36 **IV: Univariate outcome model (3-level), with sex as only covariate (analysing the same sample and covariates as models presented in**  
 37 **main manuscript)**

38 As Table IV indicates, when sex is the only covariate, females' BPV was predicted to be -28.4% (-33.1%, -23.2%) lower than that for males  
 39 (SD(BP): -15.4% (-18.2%, -12.4%)).

40 Table IV. Estimates from univariate outcome model, analysing SBP as the outcome, with sex as the only covariate, presenting the mean and  
 41 credible intervals for the posterior parameter estimates of the regression coefficients (except where indicated).

| Model                                   | Sex    |        |        |
|-----------------------------------------|--------|--------|--------|
| N individuals                           | 1,986  |        |        |
| N clinic visits                         | 10,556 |        |        |
| N BP measurements                       | 19,360 |        |        |
|                                         | Mean   | 2.5%   | 97.5%  |
| Mean SBP: fixed effects                 |        |        |        |
| Intercept                               | 107.63 | 107.16 | 108.11 |
| Female                                  | -0.35  | -0.97  | 0.28   |
| Individual-level random effects for SBP |        |        |        |
| SD(mean BP) <sup>a</sup>                | 4.95   | 4.64   | 5.27   |
| SD(log(BPV)) <sup>a</sup>               | 0.12   | 0.07   | 0.18   |

|                                     |         |         |         |
|-------------------------------------|---------|---------|---------|
| Cor(mean BP, log(BPV)) <sup>a</sup> | 0.80    | 0.54    | 0.97    |
| BPV: fixed effects                  |         |         |         |
| Intercept                           | 4.86    | 4.81    | 4.91    |
| Female <sup>b</sup>                 | -28.36% | -33.09% | -23.21% |
| Residual within-clinic SD           |         |         |         |
| for SBP                             | 5.61    | 5.53    | 5.69    |

42

43 <sup>a</sup> mean BP denotes the individual-level, between-clinic, random effects for the intercept (at mean age 11.3 years) in the mean function for SBP;

44 BP slope denotes the individual-level, between-clinic, random effects for age in the mean function for SBP; log(BPV) denotes the individual-level,

45 between-clinic, random effects on the log-scale of the within-individual variance.

46 <sup>b</sup> estimates presented as percentage change in LVMI (on natural scale) per 1-unit change in covariate.

47 **V: Full estimates from the joint models presented in the main manuscript**

48 Table Va: Full estimates from the joint models presented in Table 3 in the main manuscript: i.e. estimates from joint models in which mean BP,  
 49 BP slope, and log(BPV) are alternately included as exposures for log(LVMI). The mean and credible intervals for the posterior parameter estimates  
 50 of the regression coefficients (except where indicated).

| Model                   | mean BP only |        |        | BP slope only |        |        | log(BPV) only |        |        | mean BP, BP slope, log(BPV) all included |        |        |
|-------------------------|--------------|--------|--------|---------------|--------|--------|---------------|--------|--------|------------------------------------------|--------|--------|
|                         | Mean         | 2.5%   | 97.5%  | Mean          | 2.5%   | 97.5%  | Mean          | 2.5%   | 97.5%  | Mean                                     | 2.5%   | 97.5%  |
| N individuals           | 1,813        |        |        | 1,813         |        |        | 1,813         |        |        | 1,813                                    |        |        |
| N clinic visits         | 9,693        |        |        | 9,693         |        |        | 9,693         |        |        | 9,693                                    |        |        |
| N BP measurements       | 17,777       |        |        | 17,777        |        |        | 17,777        |        |        | 17,777                                   |        |        |
| Mean SBP: fixed effects |              |        |        |               |        |        |               |        |        |                                          |        |        |
| Intercept               | 108.23       | 107.28 | 109.18 | 108.23        | 107.29 | 109.17 | 108.21        | 107.26 | 109.14 | 108.23                                   | 107.29 | 109.16 |
| ≤12 years <sup>a</sup>  | -0.54        | -0.80  | -0.27  | -0.49         | -0.75  | -0.23  | -0.51         | -0.77  | -0.25  | -0.56                                    | -0.83  | -0.30  |
| >12 years <sup>a</sup>  | 3.88         | 3.54   | 4.23   | 3.94          | 3.60   | 4.28   | 3.92          | 3.58   | 4.26   | 3.83                                     | 3.49   | 4.18   |
| Female                  | -0.25        | -0.83  | 0.33   | -0.29         | -0.87  | 0.30   | -0.27         | -0.85  | 0.32   | -0.22                                    | -0.81  | 0.36   |
| Female*≤12 years        | -0.17        | -0.35  | 0.02   | -0.16         | -0.34  | 0.03   | -0.16         | -0.35  | 0.02   | -0.17                                    | -0.36  | 0.01   |
| Female*>12 years        | -1.29        | -1.61  | -0.96  | -1.32         | -1.64  | -1.00  | -1.31         | -1.63  | -0.98  | -1.25                                    | -1.58  | -0.92  |
| log(Weight, kg)         | 16.79        | 15.08  | 18.51  | 16.95         | 15.24  | 18.64  | 16.93         | 15.22  | 18.64  | 16.56                                    | 14.84  | 18.26  |
| Height (cm)             | 0.05         | -0.01  | 0.10   | 0.03          | -0.02  | 0.08   | 0.04          | -0.01  | 0.09   | 0.06                                     | 0.00   | 0.11   |

|                                         |        |        |        |        |        |        |        |        |        |        |        |        |
|-----------------------------------------|--------|--------|--------|--------|--------|--------|--------|--------|--------|--------|--------|--------|
| Maternal characteristics                |        |        |        |        |        |        |        |        |        |        |        |        |
| Age at delivery (years)                 | 0.01   | -0.06  | 0.08   | 0.01   | -0.06  | 0.08   | 0.01   | -0.06  | 0.08   | 0.01   | -0.06  | 0.09   |
| Parity                                  | -0.16  | -0.50  | 0.17   | -0.17  | -0.51  | 0.17   | -0.17  | -0.50  | 0.17   | -0.17  | -0.50  | 0.17   |
| Highest ed.: vocational <sup>b</sup>    | -0.02  | -1.35  | 1.32   | 0.03   | -1.29  | 1.36   | 0.02   | -1.31  | 1.35   | -0.04  | -1.36  | 1.30   |
| Highest ed.: O-level <sup>b</sup>       | 0.06   | -0.94  | 1.06   | 0.09   | -0.90  | 1.08   | 0.09   | -0.90  | 1.11   | 0.05   | -0.95  | 1.03   |
| Highest ed.: A-level <sup>b</sup>       | -0.64  | -1.68  | 0.42   | -0.62  | -1.67  | 0.43   | -0.62  | -1.65  | 0.43   | -0.64  | -1.70  | 0.40   |
| Highest ed.: Degree <sup>b</sup>        | -1.37  | -2.50  | -0.25  | -1.33  | -2.44  | -0.22  | -1.33  | -2.45  | -0.20  | -1.39  | -2.50  | -0.27  |
| Individual-level random effects for SBP |        |        |        |        |        |        |        |        |        |        |        |        |
| SD(mean BP) <sup>c</sup>                | 5.39   | 5.15   | 5.63   | 5.39   | 5.16   | 5.63   | 5.38   | 5.15   | 5.62   | 5.39   | 5.16   | 5.63   |
| SD(BP slope) <sup>c</sup>               | 0.65   | 0.55   | 0.75   | 0.65   | 0.55   | 0.75   | 0.65   | 0.55   | 0.75   | 0.65   | 0.54   | 0.74   |
| SD(log(BPV)) <sup>c</sup>               | 0.44   | 0.33   | 0.54   | 0.44   | 0.33   | 0.55   | 0.42   | 0.30   | 0.53   | 0.42   | 0.29   | 0.53   |
| Cor(mean BP, BP slope) <sup>c</sup>     | -0.08  | -0.21  | 0.03   | -0.07  | -0.19  | 0.05   | -0.09  | -0.21  | 0.03   | -0.09  | -0.21  | 0.03   |
| Cor(mean BP, log(BPV)) <sup>c</sup>     | 0.48   | 0.32   | 0.66   | 0.48   | 0.32   | 0.66   | 0.51   | 0.34   | 0.70   | 0.50   | 0.33   | 0.71   |
| Cor(BP slope, log(BPV)) <sup>c</sup>    | -0.06  | -0.32  | 0.21   | -0.07  | -0.34  | 0.19   | -0.02  | -0.30  | 0.26   | -0.05  | -0.34  | 0.23   |
| BPV: fixed effects                      |        |        |        |        |        |        |        |        |        |        |        |        |
| Intercept                               | 3.11   | 3.00   | 3.22   | 3.11   | 3.00   | 3.22   | 3.12   | 3.00   | 3.23   | 3.13   | 3.02   | 3.23   |
| Age (years) <sup>d</sup>                | 9.77%  | 4.20%  | 15.58% | 9.80%  | 4.25%  | 15.61% | 9.60%  | 4.01%  | 15.49% | 10.76% | 5.05%  | 16.77% |
| Female <sup>d</sup>                     | 20.79% | 6.72%  | 36.84% | 20.93% | 7.03%  | 36.76% | 21.27% | 7.42%  | 37.05% | 19.83% | 5.99%  | 35.46% |
| log(Weight, kg) <sup>e</sup>            | 4.78%  | 1.04%  | 8.72%  | 4.76%  | 1.05%  | 8.62%  | 4.59%  | 0.85%  | 8.48%  | 5.22%  | 1.42%  | 9.20%  |
| Height (cm) <sup>d</sup>                | 0.00%  | -1.06% | 1.07%  | -0.02% | -1.09% | 1.03%  | 0.08%  | -1.01% | 1.18%  | -0.24% | -1.36% | 0.89%  |



|                           |        |        |        |        |        |        |        |        |        |        |        |        |
|---------------------------|--------|--------|--------|--------|--------|--------|--------|--------|--------|--------|--------|--------|
| Residual within-clinic SD |        |        |        |        |        |        |        |        |        |        |        |        |
| for SBP                   | 5.62   | 5.53   | 5.70   | 5.62   | 5.53   | 5.70   | 5.62   | 5.53   | 5.70   | 5.61   | 5.53   | 5.70   |
| Mean for log(LVMI): fixed |        |        |        |        |        |        |        |        |        |        |        |        |
| effects                   |        |        |        |        |        |        |        |        |        |        |        |        |
| Intercept                 | 3.32   | 3.31   | 3.33   | 3.32   | 3.31   | 3.33   | 3.32   | 3.31   | 3.33   | 3.32   | 3.31   | 3.33   |
| Age (years) <sup>d</sup>  | -1.99% | -4.64% | 0.72%  | -2.11% | -4.79% | 0.63%  | -2.04% | -4.72% | 0.69%  | -1.95% | -4.61% | 0.79%  |
| Female <sup>d</sup>       | -5.01% | -6.76% | -3.24% | -4.98% | -6.73% | -3.20% | -5.01% | -6.76% | -3.23% | -4.95% | -6.72% | -3.17% |
| Weight (kg) <sup>d</sup>  | 0.70%  | 0.63%  | 0.77%  | 0.70%  | 0.63%  | 0.77%  | 0.70%  | 0.63%  | 0.77%  | 0.70%  | 0.63%  | 0.78%  |
| mean BP <sup>c,d</sup>    | 0.19%  | 0.00%  | 0.39%  |        |        |        |        |        |        | 0.59%  | 0.12%  | 1.37%  |
| BP slope <sup>c,d</sup>   |        |        |        | 2.39%  | -0.51% | 5.56%  |        |        |        | 3.56%  | 0.01%  | 7.92%  |
| log(BPV) <sup>c,e</sup>   |        |        |        |        |        |        | 0.21%  | -0.23% | 0.69%  | -0.78% | -2.54% | 0.22%  |
| Residual SD for log(LVMI) | 0.19   | 0.18   | 0.20   | 0.19   | 0.18   | 0.20   | 0.19   | 0.18   | 0.20   | 0.19   | 0.18   | 0.19   |

51  
52 <sup>a</sup> Linear spline terms, corresponding to change per year for age  $\leq 12$ , and for age  $>12$ , respectively.

53 <sup>b</sup> Reference category for mother's highest education qualification: CSE / None.

54 <sup>c</sup> mean BP denotes the individual-level, between-clinic, random effects for the intercept (at mean age 11.3 years) in the mean function for SBP;  
55 BP slope denotes the individual-level, between-clinic, random effects for age in the mean function for SBP; log(BPV) denotes the individual-level,  
56 between-clinic, random effects on the log-scale of the within-individual variance; i.e. these are the equivalent of  $u_0$ ,  $u_1$  and  $u_2$  in equation 3,  
57 respectively.

58 <sup>d</sup> estimates presented as percentage change in BPV / LVMI (on natural scale) per 1-unit increase in covariate.

59 <sup>e</sup> estimates presented as percentage change in BPV / LVMI (on natural scale) per 10% increase in covariate (on natural scale).

60

61

62 Table Vb: Estimates from the joint models presented in Table 3 in the main manuscript, but with regression coefficients presented for all parameter  
 63 estimates.

| Model                           | mean BP only |        |        | BP slope only |        |        | log(BPV) only |        |        | mean BP, BP slope, log(BPV) all included |        |        |
|---------------------------------|--------------|--------|--------|---------------|--------|--------|---------------|--------|--------|------------------------------------------|--------|--------|
|                                 | Mean         | 2.5%   | 97.5%  | Mean          | 2.5%   | 97.5%  | Mean          | 2.5%   | 97.5%  | Mean                                     | 2.5%   | 97.5%  |
| N individuals                   | 1,813        |        |        | 1,813         |        |        | 1,813         |        |        | 1,813                                    |        |        |
| N clinic visits                 | 9,693        |        |        | 9,693         |        |        | 9,693         |        |        | 9,693                                    |        |        |
| N BP measurements               | 17,777       |        |        | 17,777        |        |        | 17,777        |        |        | 17,777                                   |        |        |
| <b>Mean SBP: fixed effects</b>  |              |        |        |               |        |        |               |        |        |                                          |        |        |
| Intercept                       | 108.23       | 107.28 | 109.18 | 108.23        | 107.29 | 109.17 | 108.21        | 107.26 | 109.14 | 108.23                                   | 107.29 | 109.16 |
| ≤12 years <sup>a</sup>          | -0.54        | -0.80  | -0.27  | -0.49         | -0.75  | -0.23  | -0.51         | -0.77  | -0.25  | -0.56                                    | -0.83  | -0.30  |
| >12 years <sup>a</sup>          | 3.88         | 3.54   | 4.23   | 3.94          | 3.60   | 4.28   | 3.92          | 3.58   | 4.26   | 3.83                                     | 3.49   | 4.18   |
| Female                          | -0.25        | -0.83  | 0.33   | -0.29         | -0.87  | 0.30   | -0.27         | -0.85  | 0.32   | -0.22                                    | -0.81  | 0.36   |
| Female*≤12 years                | -0.17        | -0.35  | 0.02   | -0.16         | -0.34  | 0.03   | -0.16         | -0.35  | 0.02   | -0.17                                    | -0.36  | 0.01   |
| Female*>12 years                | -1.29        | -1.61  | -0.96  | -1.32         | -1.64  | -1.00  | -1.31         | -1.63  | -0.98  | -1.25                                    | -1.58  | -0.92  |
| log(Weight, kg)                 | 16.79        | 15.08  | 18.51  | 16.95         | 15.24  | 18.64  | 16.93         | 15.22  | 18.64  | 16.56                                    | 14.84  | 18.26  |
| Height (cm)                     | 0.05         | -0.01  | 0.10   | 0.03          | -0.02  | 0.08   | 0.04          | -0.01  | 0.09   | 0.06                                     | 0.00   | 0.11   |
| <b>Maternal characteristics</b> |              |        |        |               |        |        |               |        |        |                                          |        |        |
| Age at delivery (years)         | 0.01         | -0.06  | 0.08   | 0.01          | -0.06  | 0.08   | 0.01          | -0.06  | 0.08   | 0.01                                     | -0.06  | 0.09   |
| Parity                          | -0.16        | -0.50  | 0.17   | -0.17         | -0.51  | 0.17   | -0.17         | -0.50  | 0.17   | -0.17                                    | -0.50  | 0.17   |

|                                         |       |       |       |       |       |       |       |       |       |       |       |       |
|-----------------------------------------|-------|-------|-------|-------|-------|-------|-------|-------|-------|-------|-------|-------|
| Highest ed.: vocational <sup>b</sup>    | -0.02 | -1.35 | 1.32  | 0.03  | -1.29 | 1.36  | 0.02  | -1.31 | 1.35  | -0.04 | -1.36 | 1.30  |
| Highest ed.: O-level <sup>b</sup>       | 0.06  | -0.94 | 1.06  | 0.09  | -0.90 | 1.08  | 0.09  | -0.90 | 1.11  | 0.05  | -0.95 | 1.03  |
| Highest ed.: A-level <sup>b</sup>       | -0.64 | -1.68 | 0.42  | -0.62 | -1.67 | 0.43  | -0.62 | -1.65 | 0.43  | -0.64 | -1.70 | 0.40  |
| Highest ed.: Degree <sup>b</sup>        | -1.37 | -2.50 | -0.25 | -1.33 | -2.44 | -0.22 | -1.33 | -2.45 | -0.20 | -1.39 | -2.50 | -0.27 |
| Individual-level random effects for SBP |       |       |       |       |       |       |       |       |       |       |       |       |
| SD(mean BP) <sup>c</sup>                | 5.39  | 5.15  | 5.63  | 5.39  | 5.16  | 5.63  | 5.38  | 5.15  | 5.62  | 5.39  | 5.16  | 5.63  |
| SD(BP slope) <sup>c</sup>               | 0.65  | 0.55  | 0.75  | 0.65  | 0.55  | 0.75  | 0.65  | 0.55  | 0.75  | 0.65  | 0.54  | 0.74  |
| SD(log(BPV)) <sup>c</sup>               | 0.44  | 0.33  | 0.54  | 0.44  | 0.33  | 0.55  | 0.42  | 0.30  | 0.53  | 0.42  | 0.29  | 0.53  |
| Cor(mean BP, BP slope) <sup>c</sup>     | -0.08 | -0.21 | 0.03  | -0.07 | -0.19 | 0.05  | -0.09 | -0.21 | 0.03  | -0.09 | -0.21 | 0.03  |
| Cor(mean BP, log(BPV)) <sup>c</sup>     | 0.48  | 0.32  | 0.66  | 0.48  | 0.32  | 0.66  | 0.51  | 0.34  | 0.70  | 0.50  | 0.33  | 0.71  |
| Cor(BP slope, log(BPV)) <sup>c</sup>    | -0.06 | -0.32 | 0.21  | -0.07 | -0.34 | 0.19  | -0.02 | -0.30 | 0.26  | -0.05 | -0.34 | 0.23  |
| BPV: fixed effects                      |       |       |       |       |       |       |       |       |       |       |       |       |
| Intercept                               | 3.11  | 3.00  | 3.22  | 3.11  | 3.00  | 3.22  | 3.12  | 3.00  | 3.23  | 3.13  | 3.02  | 3.23  |
| Age (years)                             | 0.09  | 0.04  | 0.14  | 0.09  | 0.04  | 0.15  | 0.09  | 0.04  | 0.14  | 0.10  | 0.05  | 0.15  |
| Female                                  | 0.19  | 0.07  | 0.31  | 0.19  | 0.07  | 0.31  | 0.19  | 0.07  | 0.32  | 0.18  | 0.06  | 0.30  |
| log(Weight, kg)                         | 0.49  | 0.11  | 0.88  | 0.49  | 0.11  | 0.87  | 0.47  | 0.09  | 0.85  | 0.53  | 0.15  | 0.92  |
| Height (cm)                             | 0.00  | -0.01 | 0.01  | 0.00  | -0.01 | 0.01  | 0.00  | -0.01 | 0.01  | 0.00  | -0.01 | 0.01  |
| Residual within-clinic SD for SBP       |       |       |       |       |       |       |       |       |       |       |       |       |
|                                         | 5.62  | 5.53  | 5.70  | 5.62  | 5.53  | 5.70  | 5.62  | 5.53  | 5.70  | 5.61  | 5.53  | 5.70  |

Mean for log(LVMI): fixed

effects

|                           |       |       |       |       |       |       |       |       |       |       |       |       |
|---------------------------|-------|-------|-------|-------|-------|-------|-------|-------|-------|-------|-------|-------|
| Intercept                 | 3.32  | 3.31  | 3.33  | 3.32  | 3.31  | 3.33  | 3.32  | 3.31  | 3.33  | 3.32  | 3.31  | 3.33  |
| Age (years)               | -0.02 | -0.05 | 0.01  | -0.02 | -0.05 | 0.01  | -0.02 | -0.05 | 0.01  | -0.02 | -0.05 | 0.01  |
| Female                    | -0.05 | -0.07 | -0.03 | -0.05 | -0.07 | -0.03 | -0.05 | -0.07 | -0.03 | -0.05 | -0.07 | -0.03 |
| Weight (kg)               | 0.01  | 0.01  | 0.01  | 0.01  | 0.01  | 0.01  | 0.01  | 0.01  | 0.01  | 0.01  | 0.01  | 0.01  |
| mean BP <sup>c</sup>      | 0.00  | 0.00  | 0.00  |       |       |       |       |       |       | 0.01  | 0.00  | 0.01  |
| BP slope <sup>c</sup>     |       |       |       | 0.02  | -0.01 | 0.05  |       |       |       | 0.03  | 0.00  | 0.08  |
| log(BPV) <sup>c</sup>     |       |       |       |       |       |       | 0.02  | -0.02 | 0.07  | -0.08 | -0.27 | 0.02  |
| Residual SD for log(LVMI) | 0.19  | 0.18  | 0.20  | 0.19  | 0.18  | 0.20  | 0.19  | 0.18  | 0.20  | 0.19  | 0.18  | 0.19  |

64 <sup>a</sup> Linear spline terms, corresponding to change per year for age  $\leq 12$ , and for age  $>12$ , respectively.

65 <sup>b</sup> Reference category for mother's highest education qualification: CSE / None.

66 <sup>c</sup> mean BP denotes the individual-level, between-clinic, random effects for the intercept (at mean age 11.3 years) in the mean function for SBP;

67 BP slope denotes the individual-level, between-clinic, random effects for age in the mean function for SBP; log(BPV) denotes the individual-level,

68 between-clinic, random effects on the log-scale of the within-individual variance; i.e. these are the equivalent of  $u_0$ ,  $u_1$  and  $u_2$  in equation 3,

69 respectively.

70

71 Table Vc: Estimates from the joint models presented in Table 2 in the main manuscript, but with regression coefficients presented for all parameter  
 72 estimates.

73

| Model                    | A: Age & Sex |        |        | B: Adding weight and height |        |        | C: Adding maternal characteristics |        |        |
|--------------------------|--------------|--------|--------|-----------------------------|--------|--------|------------------------------------|--------|--------|
| N individuals            | 1,986        |        |        | 1,986                       |        |        | 1,813                              |        |        |
| N clinic visits          | 10,556       |        |        | 10,556                      |        |        | 9,693                              |        |        |
| N BP measurements        | 19,360       |        |        | 19,360                      |        |        | 17,777                             |        |        |
|                          | Mean         | 2.5%   | 97.5%  | Mean                        | 2.5%   | 97.5%  | Mean                               | 2.5%   | 97.5%  |
| Mean SBP: fixed effects  |              |        |        |                             |        |        |                                    |        |        |
| Intercept                | 107.95       | 107.50 | 108.40 | 107.93                      | 107.52 | 108.34 | 108.23                             | 107.29 | 109.16 |
| ≤12 years <sup>a</sup>   | 1.71         | 1.58   | 1.85   | -0.55                       | -0.81  | -0.30  | -0.56                              | -0.83  | -0.30  |
| >12 years <sup>a</sup>   | 6.00         | 5.80   | 6.21   | 3.83                        | 3.51   | 4.16   | 3.83                               | 3.49   | 4.18   |
| Female                   | -0.43        | -1.02  | 0.19   | -0.40                       | -0.96  | 0.16   | -0.22                              | -0.81  | 0.36   |
| Female*≤12 years         | 0.07         | -0.11  | 0.25   | -0.15                       | -0.33  | 0.03   | -0.17                              | -0.36  | 0.01   |
| Female*>12 years         | -1.99        | -2.28  | -1.71  | -1.26                       | -1.57  | -0.95  | -1.25                              | -1.58  | -0.92  |
| log(Weight, kg)          |              |        |        | 17.01                       | 15.39  | 18.64  | 16.56                              | 14.84  | 18.26  |
| Height (cm)              |              |        |        | 0.04                        | 0.00   | 0.09   | 0.06                               | 0.00   | 0.11   |
| Maternal characteristics |              |        |        |                             |        |        |                                    |        |        |
| Age at delivery (years)  |              |        |        |                             |        |        | 0.01                               | -0.06  | 0.09   |
| Parity                   |              |        |        |                             |        |        | -0.17                              | -0.50  | 0.17   |

|                                         |       |       |      |       |       |      |       |       |       |
|-----------------------------------------|-------|-------|------|-------|-------|------|-------|-------|-------|
| Highest ed.: vocational <sup>b</sup>    |       |       |      |       |       |      | -0.04 | -1.36 | 1.30  |
| Highest ed.: O-level <sup>b</sup>       |       |       |      |       |       |      | 0.05  | -0.95 | 1.03  |
| Highest ed.: A-level <sup>b</sup>       |       |       |      |       |       |      | -0.64 | -1.70 | 0.40  |
| Highest ed.: Degree <sup>b</sup>        |       |       |      |       |       |      | -1.39 | -2.50 | -0.27 |
| Individual-level random effects for SBP |       |       |      |       |       |      |       |       |       |
| SD(mean BP) <sup>c</sup>                | 6.12  | 5.88  | 6.37 | 5.37  | 5.14  | 5.60 | 5.39  | 5.16  | 5.63  |
| SD(BP slope) <sup>c</sup>               | 0.66  | 0.55  | 0.75 | 0.64  | 0.54  | 0.73 | 0.65  | 0.54  | 0.74  |
| SD(log(BPV)) <sup>c</sup>               | 0.41  | 0.29  | 0.51 | 0.39  | 0.26  | 0.50 | 0.42  | 0.29  | 0.53  |
| Cor(mean BP, BP slope) <sup>c</sup>     | -0.09 | -0.20 | 0.02 | -0.11 | -0.23 | 0.00 | -0.09 | -0.21 | 0.03  |
| Cor(mean BP, log(BPV)) <sup>c</sup>     | 0.52  | 0.36  | 0.71 | 0.49  | 0.31  | 0.72 | 0.50  | 0.33  | 0.71  |
| Cor(BP slope, log(BPV)) <sup>c</sup>    | -0.06 | -0.34 | 0.22 | -0.04 | -0.33 | 0.26 | -0.05 | -0.34 | 0.23  |
| BPV: fixed effects                      |       |       |      |       |       |      |       |       |       |
| Intercept                               | 3.22  | 3.12  | 3.32 | 3.15  | 3.04  | 3.25 | 3.13  | 3.02  | 3.23  |
| Age (years)                             | 0.14  | 0.12  | 0.17 | 0.11  | 0.06  | 0.16 | 0.10  | 0.05  | 0.15  |
| Female                                  | 0.15  | 0.04  | 0.27 | 0.16  | 0.05  | 0.27 | 0.18  | 0.06  | 0.30  |
| log(Weight, kg)                         |       |       |      | 0.59  | 0.22  | 0.96 | 0.53  | 0.15  | 0.92  |
| Height (cm)                             |       |       |      | 0.00  | -0.01 | 0.01 | 0.00  | -0.01 | 0.01  |
| Residual within-clinic SD for SBP       |       |       |      |       |       |      |       |       |       |
|                                         | 5.62  | 5.54  | 5.70 | 5.63  | 5.54  | 5.71 | 5.61  | 5.53  | 5.70  |

Mean for log(LVMI): fixed

effects

|                           |       |       |       |       |       |       |       |       |       |
|---------------------------|-------|-------|-------|-------|-------|-------|-------|-------|-------|
| Intercept                 | 3.36  | 3.35  | 3.37  | 3.33  | 3.31  | 3.34  | 3.32  | 3.31  | 3.33  |
| Age (years)               | 0.00  | -0.03 | 0.03  | -0.02 | -0.04 | 0.01  | -0.02 | -0.05 | 0.01  |
| Female                    | -0.12 | -0.13 | -0.10 | -0.06 | -0.07 | -0.04 | -0.05 | -0.07 | -0.03 |
| Weight (kg)               |       |       |       | 0.01  | 0.01  | 0.01  | 0.01  | 0.01  | 0.01  |
| mean BP <sup>c</sup>      | 0.01  | 0.00  | 0.01  | 0.01  | 0.00  | 0.01  | 0.01  | 0.00  | 0.01  |
| BP slope <sup>c</sup>     | 0.04  | 0.01  | 0.08  | 0.04  | 0.00  | 0.08  | 0.03  | 0.00  | 0.08  |
| log(BPV) <sup>c</sup>     | -0.06 | -0.22 | 0.04  | -0.09 | -0.33 | 0.03  | -0.08 | -0.27 | 0.02  |
| Residual SD for log(LVMI) | 0.20  | 0.19  | 0.21  | 0.19  | 0.17  | 0.19  | 0.19  | 0.18  | 0.19  |

74 <sup>a</sup> Linear spline terms, corresponding to change per year for age  $\leq 12$ , and for age  $>12$ , respectively.

75 <sup>b</sup> Reference category for mother's highest education qualification: CSE / None.

76 <sup>c</sup> mean BP denotes the individual-level, between-clinic, random effects for the intercept (at mean age 11.3 years) in the mean function for SBP;  
77 BP slope denotes the individual-level, between-clinic, random effects for age in the mean function for SBP; log(BPV) denotes the individual-level,  
78 between-clinic, random effects on the log-scale of the within-individual variance; i.e. these are the equivalent of  $u_0$ ,  $u_1$  and  $u_2$  in equation 3,  
79 respectively.

80

81



- 82 1. Chen W, Srinivasan SR, Ruan LT, Mei H, Berenson GS. Adult Hypertension Is Associated With Blood Pressure Variability in Childhood  
83 in Blacks and Whites: The Bogalusa Heart Study. *American Journal of Hypertension* 2011; **24**: 77-82.
- 84 2. Rosner B, Cook NR, Evans DA, et al. Reproducibility and predictive values of routine blood-pressure measurements in children -  
85 comparison with adult values and implications for screening-children for elevated blood-pressure. *American Journal of Epidemiology* 1987; **126**:  
86 1115-25.

87
